# Supplementary material
Source: publisher figshare collection journal article supplement (https://acs.figshare.com/ndownloader/files/5406851)
Supplement: Supplementary file 1 [file 5406851]

## **Supporting Information**

# Nanoporous Gyroid-Structured Epoxy with Controlled Pore Size from Block Copolymer Templates for High Protein Adsorbability

Xin-Bo Wang,<sup>‡,†</sup> Tze-Chung Lin,<sup>†</sup> Han-Yu Hsueh,<sup>†</sup> Shih-Chieh Lin,<sup>†</sup> Xiao-  
Dong He,<sup>§</sup> and Rong-Ming Ho<sup>\*,†</sup>

<sup>‡</sup>School of Materials Science and Engineering, Harbin Institute of Technology at Weihai,  
Weihai, Shandong 264209, China

<sup>†</sup>Department of Chemical Engineering, National Tsing Hua University, Hsinchu 30013,  
Taiwan

<sup>§</sup>Center for Composite Materials and Structures, Harbin Institute of Technology, Harbin  
150080, China

\* To whom correspondence should be addressed.

Tel: +886-3-5738349; Fax: +886-3-5715408; E-mail: [rmho@mx.nthu.edu.tw](mailto:rmho@mx.nthu.edu.tw);

Department of Chemical Engineering, National Tsing Hua University, Hsinchu 30013,  
Taiwan

### Synthetic Routes of PS-PLLA Diblock Copolymers.

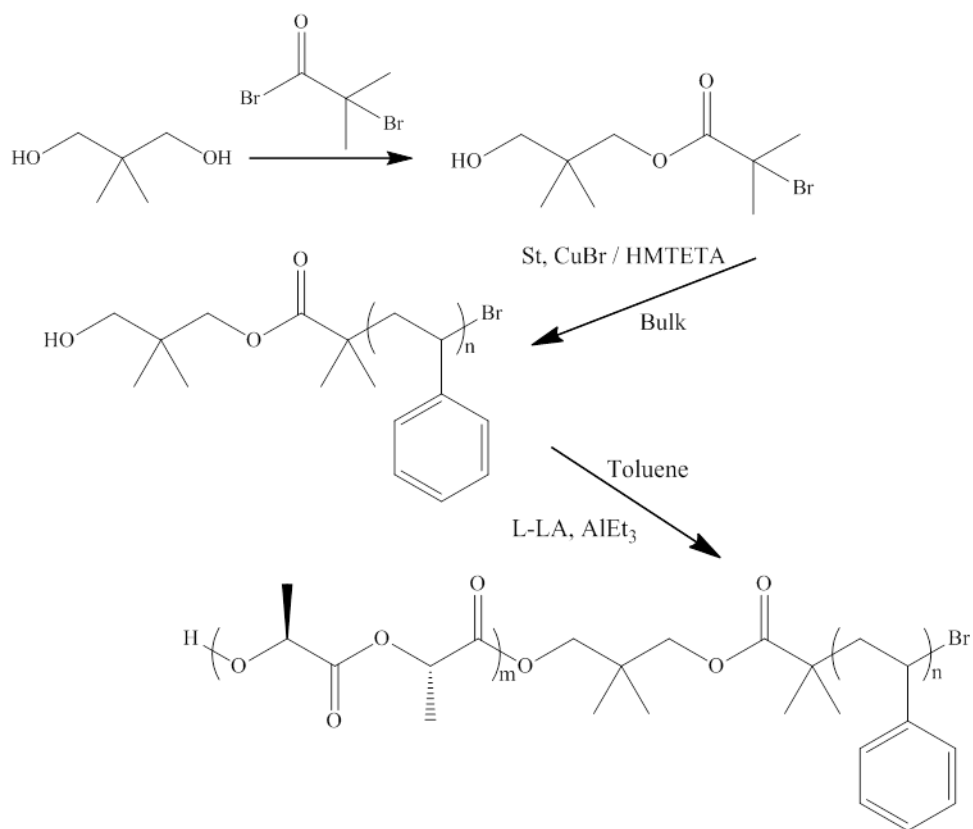

**Scheme S1.** Synthesis routes of PS-PLLA diblock copolymers.
